# Supplementary material for: Agreement and comparative accuracy of instability criteria at discharge for predicting adverse events in patients with community-acquired pneumonia
Source: PubMed Central journal article supplement — BMJ Open Respir Res. 2024 Nov 7;11(1):e002289. doi: 10.1136/bmjresp-2024-002289 (PMC11551989; doi:10.1136/bmjresp-2024-002289), 2024-11-07
Supplement: bmjresp-11-1-s001.pdf [file bmjresp-11-1-s001.pdf]

**Appendix A.** Variables entered in multivariate imputation by chained equations model

| Variable                               | No. observations per imputation set |            |         |       |
|----------------------------------------|-------------------------------------|------------|---------|-------|
|                                        | Complete                            | Incomplete | Imputed | Total |
| Study site                             | 1038                                | 0          | 0       | 1038  |
| Age                                    | 1038                                | 0          | 0       | 1038  |
| Gender                                 | 1038                                | 0          | 0       | 1038  |
| Nursing home resident                  | 1029                                | 9          | 9       | 1038  |
| Neoplastic disease                     | 1038                                | 0          | 0       | 1038  |
| Liver disease                          | 1038                                | 0          | 0       | 1038  |
| Renal disease                          | 1038                                | 0          | 0       | 1038  |
| Congestive heart failure               | 1038                                | 0          | 0       | 1038  |
| Cerebrovascular disease                | 1038                                | 0          | 0       | 1038  |
| Home oxygen therapy prior to admission | 1037                                | 1          | 1       | 1038  |
| ICU admission                          | 1038                                | 0          | 0       | 1038  |
| Length of stay                         | 1038                                | 0          | 0       | 1038  |
| Instability criteria at discharge      |                                     |            |         |       |
| Temperature                            | 993                                 | 45         | 45      | 1038  |
| Heart rate                             | 984                                 | 54         | 54      | 1038  |
| Respiratory rate                       | 27                                  | 1011       | 1011    | 1038  |
| Systolic blood pressure                | 992                                 | 46         | 46      | 1038  |
| Diastolic blood pressure               | 991                                 | 47         | 47      | 1038  |
| Oxygenation saturation rate            | 814                                 | 224        | 224     | 1038  |
| PaO <sub>2</sub>                       | 186                                 | 852        | 852     | 1038  |
| Supplemental oxygen                    | 1036                                | 2          | 2       | 1038  |
| Oxygen flow                            | 1031                                | 7          | 7       | 1038  |
| Mental status                          | 1038                                | 0          | 0       | 1038  |
| Ability to maintain oral intake        | 1038                                | 0          | 0       | 1038  |
| 30-day post-discharge adverse events   |                                     |            |         |       |
| Mortality                              | 1038                                | 0          | 0       | 1038  |
| Unplanned readmission                  | 1038                                | 0          | 0       | 1038  |

Abbreviations: ICU = intensive care unit; PaO<sub>2</sub> = partial pressure of arterial oxygen.

## Appendix B. Study cohort

\* Sixteen additional deaths occurred during the course of hospital readmission.

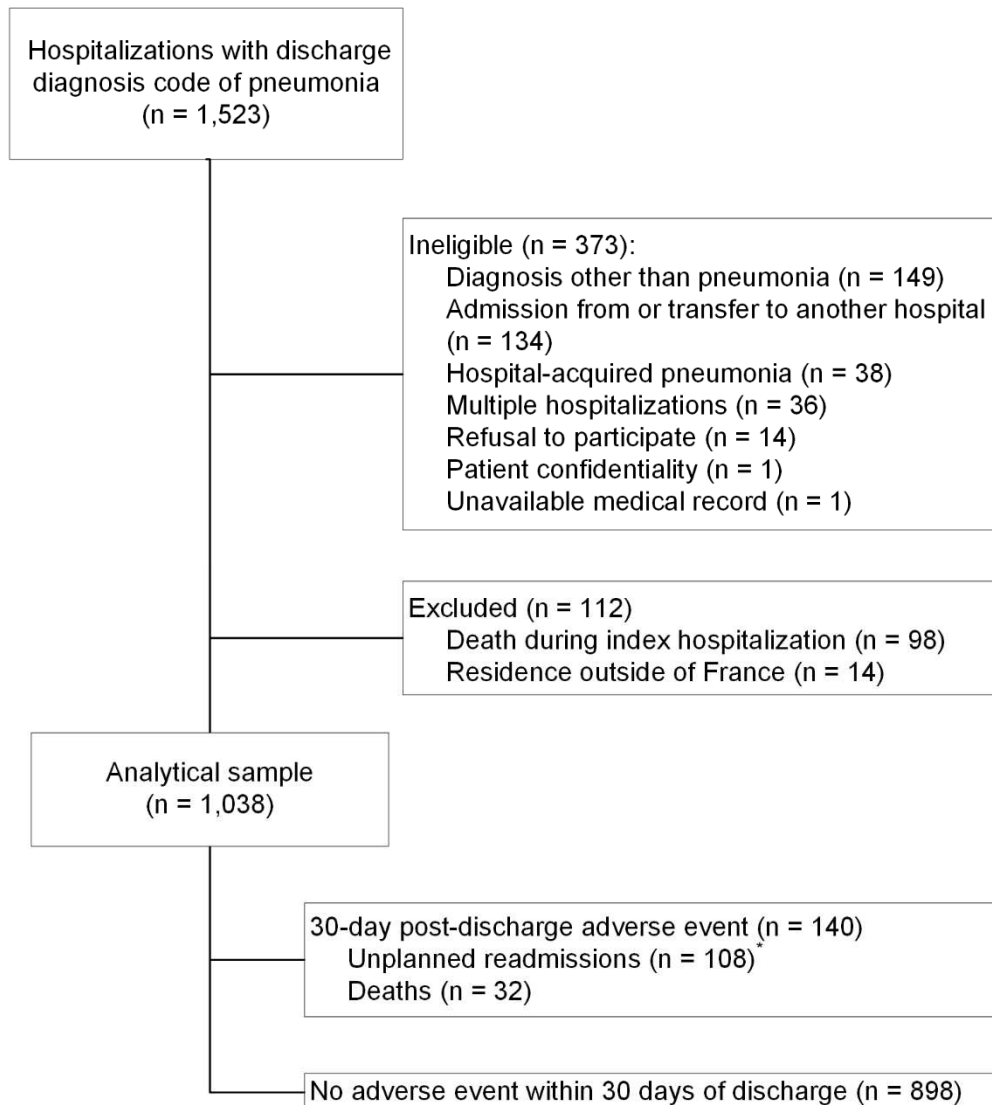

**Appendix C.** Baseline characteristics of survivors of hospitalisations for community-acquired pneumonia (n = 1038)

| Characteristics                                          |            |
|----------------------------------------------------------|------------|
| Male gender, <i>n (%)</i>                                | 587 (56.6) |
| Age, median (IQR), <i>year</i>                           | 77 (63–86) |
| Nursing home resident, <i>n (%)</i>                      | 154 (14.8) |
| Comorbid Conditions, <i>n (%)</i>                        |            |
| Neoplastic disease                                       | 115 (11.1) |
| Liver disease                                            | 43 (4.1)   |
| Cerebrovascular disease                                  | 143 (13.8) |
| Congestive heart failure                                 | 132 (12.7) |
| Renal disease                                            | 156 (15.0) |
| Physical examination findings on admission, <i>n (%)</i> |            |
| Temperature < 35 or ≥ 40°C                               | 25 (2.4)   |
| Respiratory rate ≥ 30 per min                            | 153 (14.7) |
| Systolic blood pressure < 90 mmHg                        | 83 (8.0)   |
| Pulse rate ≥ 125 per min                                 | 102 (9.8)  |
| Altered mental status                                    | 201 (19.4) |
| Laboratory and X-ray findings on admission, <i>n (%)</i> |            |
| Arterial pH < 7.35                                       | 46 (4.4)   |
| Blood urea nitrogen ≥ 11 mmol/L                          | 266 (25.6) |
| Sodium < 130 mmol/L                                      | 46 (4.4)   |
| Glucose ≥ 14 mmol/L                                      | 49 (4.7)   |
| Hematocrit < 30%                                         | 67 (6.5)   |
| PaO <sub>2</sub> < 60 mmHg or oxygen saturation < 90%    | 231 (22.3) |
| Pleural effusion                                         | 180 (17.3) |
| Pneumonia Severity Index risk class, <i>n (%)</i>        |            |
| I-III                                                    | 398 (38.3) |
| IV                                                       | 447 (43.1) |
| V                                                        | 193 (18.6) |
| ICU admission, <i>n (%)</i>                              | 129 (12.4) |
| Length of stay, median (IQR), <i>d</i>                   | 8 (4–13)   |

Abbreviations: ICU = intensive care unit; IQR = interquartile range (i.e., 25-75<sup>th</sup> percentiles); PaO<sub>2</sub> = partial pressure of arterial oxygen

**Appendix D.** Physical examination findings at discharge among survivors of hospitalisations for community-acquired pneumonia (n = 1038)

| Physical examination findings at discharge | Median (IQR) or No. (%) | No. (%) missing values |
|--------------------------------------------|-------------------------|------------------------|
| Temperature, °C                            | 36.9 (36.6–37.2)        | 45 (4.3)               |
| Pulse rate, <i>per min</i>                 | 83 (73–94)              | 54 (5.2)               |
| Respiratory rate, <i>per min</i>           | 23 (19–28)              | 1011 (97.4)            |
| Systolic blood pressure, <i>mmHg</i>       | 122 (110–138)           | 46 (4.4)               |
| Diastolic blood pressure, <i>mmHg</i>      | 69 (60–77)              | 47 (4.5)               |
| Oxygen saturation, %                       | 95 (93–96)              | 224 (21.6)             |
| PaO <sub>2</sub> , <i>mmHg</i>             | 68 (61–77)              | 852 (82.1)             |
| Supplemental oxygen                        | 131 (12.6)              | 2 (0.2)                |
| Inability to maintain oral intake          | 56 (5.4)                | 0 (0)                  |
| Altered mental status                      | 66 (6.4)                | 0 (0)                  |

Abbreviations: IQR = interquartile range (i.e., 25-75<sup>th</sup> percentiles), PaO<sub>2</sub> = partial pressure of arterial oxygen

**Appendix E.** Main reasons for unplanned readmissions among survivors of hospitalisations for community-acquired pneumonia (n = 108)

| Primary reason                            | No. (%) <sup>*</sup> |
|-------------------------------------------|----------------------|
| Readmission caused by a new affection     | 52 (48.1)            |
| Complication of surgical care             | 0 (...)              |
| Complication of nonsurgical care          | 5 (4.6)              |
| Drug-related adverse event                | 10 (9.3)             |
| Premature discharge                       | 16 (14.8)            |
| Missing or erroneous diagnosis or therapy | 22 (20.4)            |
| Other inadequate discharge                | 26 (24.1)            |
| Failure of post-discharge follow-up care  | 19 (17.6)            |
| Inadequate patient behavior               | 5 (4.6)              |
| Relapse or aggravation of pneumonia       | 76 (70.4)            |
| Social readmission                        | 4 (3.7)              |

<sup>\*</sup> Numbers and percentages of patients for whom the primary reason for unplanned readmission was independently assigned by one to four panellists (See Methods section).

**Appendix F.** Agreement coefficient point estimates (95% confidence interval) for binary definitions of clinical instability at discharge among survivors of hospitalisations for community-acquired pneumonia (n = 1038)

Agreement coefficient\*

|                      |      |             |
|----------------------|------|-------------|
| Fleiss Kappa         | 0.47 | (0.44–0.50) |
| Conger Kappa         | 0.47 | (0.44–0.51) |
| Krippendorff Alpha   | 0.47 | (0.43–0.50) |
| Brennan and Prediger | 0.57 | (0.54–0.61) |
| Gwet                 | 0.65 | (0.61–0.68) |

\* Missing values for the instability criteria at discharge were imputed as zero (See Methods section).

**Appendix G.** Univariable associations of primary and secondary study outcomes with clinical instability at discharge among survivors of hospitalisations for community-acquired pneumonia (n = 1038)

| Author, year                                    | Death or unplanned readmission within 30 days of discharge* |                  | Unplanned readmission within 30 days of discharge* |                  | Death within 30 days of discharge* |                  |
|-------------------------------------------------|-------------------------------------------------------------|------------------|----------------------------------------------------|------------------|------------------------------------|------------------|
|                                                 | No. instabilities                                           | n/N (%)          | OR (95% CI)                                        | n/N (%)          | OR (95% CI)                        | n/N (%)          |
| <i>Halm et al, 2002</i> <sup>15</sup>           |                                                             |                  |                                                    |                  |                                    |                  |
| 0                                               | 77/718 (10.7)                                               | 1.00 (...)       | 65/718 (9.1)                                       | 1.00 (...)       | 17/718 (2.4)                       | 1.00 (...)       |
| ≥ 1                                             | 63/320 (19.7)                                               | 2.04 (1.42–2.93) | 43/320 (13.4)                                      | 1.56 (1.04–2.35) | 31/320 (9.7)                       | 4.42 (2.43–8.05) |
| <i>Dagan et al, 2006</i> <sup>14</sup>          |                                                             |                  |                                                    |                  |                                    |                  |
| 0                                               | 75/704 (10.7)                                               | 1.00 (...)       | 64/704 (9.1)                                       | 1.00 (...)       | 16/704 (2.3)                       | 1.00 (...)       |
| ≥ 1                                             | 65/334 (19.5)                                               | 2.03 (1.41–2.91) | 44/334 (13.2)                                      | 1.52 (1.01–2.28) | 32/334 (9.6)                       | 4.56 (2.48–8.36) |
| <i>Jasti et al, 2008</i> <sup>16</sup>          |                                                             |                  |                                                    |                  |                                    |                  |
| 0                                               | 96/818 (11.7)                                               | 1.00 (...)       | 75/818 (9.2)                                       | 1.00 (...)       | 28/818 (3.4)                       | 1.00 (...)       |
| ≥ 1                                             | 44/220 (20.0)                                               | 1.88 (1.27–2.78) | 33/220 (15.0)                                      | 1.75 (1.13–2.71) | 20/220 (9.1)                       | 2.82 (1.57–5.08) |
| <i>Capelastegui et al, 2008</i> <sup>12,†</sup> |                                                             |                  |                                                    |                  |                                    |                  |
| [0–1]                                           | 113/905 (12.5)                                              | 1.00 (...)       | 89/905 (9.8)                                       | 1.00 (...)       | 37/905 (4.1)                       | 1.00 (...)       |
| ≥ 2                                             | 27/133 (20.3)                                               | 1.79 (1.12–2.84) | 19/133 (14.3)                                      | 1.53 (0.90–2.59) | 11/133 (8.3)                       | 2.12 (1.06–4.21) |
| <i>Capelastegui et al, 2009</i> <sup>13</sup>   |                                                             |                  |                                                    |                  |                                    |                  |
| 0                                               | 74/612 (12.1)                                               | 1.00 (...)       | 59/612 (9.6)                                       | 1.00 (...)       | 23/612 (3.8)                       | 1.00 (...)       |
| ≥ 1                                             | 66/426 (15.5)                                               | 1.33 (0.93–1.90) | 49/426 (11.5)                                      | 1.22 (0.82–1.82) | 25/426 (5.9)                       | 1.60 (0.90–2.83) |

Abbreviations: CI = confidence interval; OR = odds ratio.

\* Missing values for the instability criteria at discharge were imputed as zero (See Methods section).

† Clinical instability was defined by a score  $\geq 2$  based on one major criterion (temperature  $>37.5^{\circ}\text{C}$ , 2 points) and three minor criteria (systolic blood pressure  $<90$  mm Hg and/or diastolic blood pressure  $<60$  mm Hg, respiratory rate  $>24$  breaths/min, and oxygen saturation  $<90\%$  and/or  $\text{PaO}_2 <60$  mmHg, 1 point each).



**Appendix H.** Odds ratios (95% confidence interval) of study outcomes associated with clinical instability at discharge among survivors of hospitalisations for community-acquired pneumonia after multiple imputation of missing values (n = 1038)

| Author, year<br>No. instabilities              | Death or unplanned readmission within 30 days of discharge |                  | Unplanned readmission within 30 days of discharge |                  | Death within 30 days of discharge |                   |
|------------------------------------------------|------------------------------------------------------------|------------------|---------------------------------------------------|------------------|-----------------------------------|-------------------|
|                                                | Primary analysis*                                          | MICE             | Primary analysis*                                 | MICE             | Primary analysis*                 | MICE              |
| <i>Halm et al, 2002</i> <sup>15</sup>          |                                                            |                  |                                                   |                  |                                   |                   |
| 0                                              | 1.00 (...)                                                 | 1.00 (...)       | 1.00 (...)                                        | 1.00 (...)       | 1.00 (...)                        | 1.00 (...)        |
| ≥ 1                                            | 2.04 (1.42–2.93)                                           | 2.23 (0.89–5.60) | 1.56 (1.04–2.35)                                  | 1.83 (0.64–5.26) | 4.42 (2.43–8.05)                  | 5.23 (1.49–18.32) |
| <i>Dagan et al, 2006</i> <sup>14</sup>         |                                                            |                  |                                                   |                  |                                   |                   |
| 0                                              | 1.00 (...)                                                 | 1.00 (...)       | 1.00 (...)                                        | 1.00 (...)       | 1.00 (...)                        | 1.00 (...)        |
| ≥ 1                                            | 2.03 (1.41–2.91)                                           | 2.03 (0.76–5.41) | 1.52 (1.01–2.28)                                  | 1.75 (0.55–5.54) | 4.56 (2.48–8.36)                  | 3.31 (1.27–8.67)  |
| <i>Jasti et al, 2008</i> <sup>16</sup>         |                                                            |                  |                                                   |                  |                                   |                   |
| 0                                              | 1.00 (...)                                                 | 1.00 (...)       | 1.00 (...)                                        | 1.00 (...)       | 1.00 (...)                        | 1.00 (...)        |
| ≥ 1                                            | 1.88 (1.27–2.78)                                           | 1.82 (0.65–5.06) | 1.75 (1.13–2.71)                                  | 1.84 (0.57–5.97) | 2.82 (1.57–5.08)                  | 1.98 (0.80–4.92)  |
| <i>Capelastegui et al, 2008</i> <sup>12†</sup> |                                                            |                  |                                                   |                  |                                   |                   |
| [0–1]                                          | 1.00 (...)                                                 | 1.00 (...)       | 1.00 (...)                                        | 1.00 (...)       | 1.00 (...)                        | 1.00 (...)        |
| ≥ 2                                            | 1.79 (1.12–2.84)                                           | 1.76 (1.08–2.87) | 1.53 (0.90–2.59)                                  | 1.55 (0.88–2.71) | 2.12 (1.06–4.21)                  | 2.57 (1.26–5.25)  |
| <i>Capelastegui et al, 2009</i> <sup>13</sup>  |                                                            |                  |                                                   |                  |                                   |                   |
| 0                                              | 1.00 (...)                                                 | 1.00 (...)       | 1.00 (...)                                        | 1.00 (...)       | 1.00 (...)                        | 1.00 (...)        |
| ≥ 1                                            | 1.33 (0.93–1.90)                                           | 1.85 (0.76–4.54) | 1.22 (0.82–1.82)                                  | 1.69 (0.59–4.85) | 1.60 (0.90–2.83)                  | 2.54 (0.74–8.66)  |

Abbreviations: MICE = multivariate imputation by chained equations.

\* Missing values for the instability criteria at discharge were imputed as zero (See Methods section).

† Clinical instability was defined by a score  $\geq 2$  based on one major criterion (temperature  $>37.5^{\circ}\text{C}$ , 2 points) and three minor criteria (systolic blood pressure  $<90$  mm Hg and/or diastolic blood pressure  $<60$  mm Hg, respiratory rate  $>24$  breaths/min, and oxygen saturation  $<90\%$  and/or  $\text{PaO}_2 <60$  mmHg, 1 point each).

**Appendix I.** Univariable associations of any readmission and mortality with clinical instability at discharge among survivors of hospitalisations for community-acquired pneumonia (n = 1038)

| Author, year                                    | Death or any readmission within 30 days of discharge* |                  | Any readmission within 30 days of discharge* |                  | Death within 30 days of discharge* |                  |
|-------------------------------------------------|-------------------------------------------------------|------------------|----------------------------------------------|------------------|------------------------------------|------------------|
|                                                 | No. instabilities                                     | n/N (%)          | OR (95% CI)                                  | n/N (%)          | OR (95% CI)                        | n/N (%)          |
| <i>Halm et al, 2002</i> <sup>15</sup>           |                                                       |                  |                                              |                  |                                    |                  |
| 0                                               | 133/718 (18.5)                                        | 1.00 (...)       | 121/718 (16.9)                               | 1.00 (...)       | 17/718 (2.4)                       | 1.00 (...)       |
| ≥ 1                                             | 81/320 (25.3)                                         | 1.49 (1.09–2.04) | 63/320 (19.7)                                | 1.21 (0.86–1.69) | 31/320 (9.7)                       | 4.42 (2.43–8.05) |
| <i>Dagan et al, 2006</i> <sup>14</sup>          |                                                       |                  |                                              |                  |                                    |                  |
| 0                                               | 131/704 (18.6)                                        | 1.00 (...)       | 120/704 (17.0)                               | 1.00 (...)       | 16/704 (2.3)                       | 1.00 (...)       |
| ≥ 1                                             | 83/334 (24.9)                                         | 1.45 (1.06–1.98) | 64/334 (19.2)                                | 1.15 (0.83–1.61) | 32/334 (9.6)                       | 4.56 (2.48–8.36) |
| <i>Jasti et al, 2008</i> <sup>16</sup>          |                                                       |                  |                                              |                  |                                    |                  |
| 0                                               | 157/818 (19.2)                                        | 1.00 (...)       | 136/818 (16.6)                               | 1.00 (...)       | 28/818 (3.4)                       | 1.00 (...)       |
| ≥ 1                                             | 57/220 (25.9)                                         | 1.47 (1.04–2.08) | 48/220 (21.8)                                | 1.40 (0.97–2.02) | 20/220 (9.1)                       | 2.82 (1.57–5.08) |
| <i>Capelastegui et al, 2008</i> <sup>12,†</sup> |                                                       |                  |                                              |                  |                                    |                  |
| [0–1]                                           | 179/905 (19.8)                                        | 1.00 (...)       | 156/905 (17.2)                               | 1.00 (...)       | 37/905 (4.1)                       | 1.00 (...)       |
| ≥ 2                                             | 35/133 (26.3)                                         | 1.45 (0.95–2.20) | 28/133 (21.1)                                | 1.28 (0.82–2.00) | 11/133 (8.3)                       | 2.12 (1.06–4.21) |
| <i>Capelastegui et al, 2009</i> <sup>13</sup>   |                                                       |                  |                                              |                  |                                    |                  |
| 0                                               | 119/612 (19.4)                                        | 1.00 (...)       | 104/612 (17.0)                               | 1.00 (...)       | 23/612 (3.8)                       | 1.00 (...)       |
| ≥ 1                                             | 95/426 (22.3)                                         | 1.19 (0.88–1.61) | 80/426 (18.8)                                | 1.13 (0.82–1.56) | 25/426 (5.9)                       | 1.60 (0.90–2.83) |

Abbreviations: CI = confidence interval; OR = odds ratio.

\* Missing values for the instability criteria at discharge were imputed as zero (See Methods section).

† Clinical instability was defined by a score  $\geq 2$  based on one major criterion (temperature  $>37.5^{\circ}\text{C}$ , 2 points) and three minor criteria (systolic blood pressure  $<90$  mm Hg and/or diastolic blood pressure  $<60$  mm Hg, respiratory rate  $>24$  breaths/min, and oxygen saturation  $<90\%$  and/or  $\text{PaO}_2 <60$  mmHg, 1 point each).

**Appendix J.** Overview of primary studies reporting on clinical instability at discharge among survivors of hospitalisations for community-acquired pneumonia

| Author, year                                        | Halm <i>et al</i> ,<br>2002 <sup>15</sup> |        | Dagan <i>et al</i> ,<br>2006 <sup>14</sup> |        | Jasti <i>et al</i> ,<br>2008 <sup>16</sup> |        | Capelastegui<br><i>et al</i> , 2008 <sup>12</sup> |        | Capelastegui <i>et al</i> ,<br>2009 <sup>13</sup> |        | Present<br>study |        |
|-----------------------------------------------------|-------------------------------------------|--------|--------------------------------------------|--------|--------------------------------------------|--------|---------------------------------------------------|--------|---------------------------------------------------|--------|------------------|--------|
| Country                                             | USA                                       |        | Israel                                     |        | USA                                        |        | Spain                                             |        | Spain                                             |        | France           |        |
| Recruitment period                                  | 1991-1994                                 |        | 2002                                       |        | 1998-1999                                  |        | 2003-2006                                         |        | 2003-2007                                         |        | 2014             |        |
| No. study sites                                     | 4                                         |        | 1                                          |        | 7                                          |        | 1                                                 |        | 1                                                 |        | 2                |        |
| No. patients alive at discharge                     | 680                                       |        | 373                                        |        | 577                                        |        | 870                                               |        | 1117                                              |        | 1038             |        |
| Age, mean (SD), y                                   | 58                                        | (19)   | 63                                         | (12)   | 70                                         | (16)   | 70                                                | (16)   | 69                                                | (17)   | 72               | (18)   |
| Male gender, <i>n</i> (%)                           | 331                                       | (48.7) | 201                                        | (53.9) | 263                                        | (45.6) | 561                                               | (64.5) | ...                                               | (...)  | 587              | (56.6) |
| PSI risk classes IV-V, <i>n</i> (%)                 | 194                                       | (28.5) | 206                                        | (55.2) | 268                                        | (46.4) | 447                                               | (51.4) | 543                                               | (48.6) | 640              | (61.7) |
| LOS, median (IQR), <i>d</i>                         | 7                                         | (5–10) | 5                                          | (3–7)  | 5                                          | (3–8)  | 3                                                 | (...)  | 3                                                 | (...)  | 8                | (4–13) |
| Instability at discharge, <i>n</i> (%) <sup>*</sup> | 130                                       | (19.1) | 82                                         | (22.0) | 59                                         | (10.2) | 89                                                | (10.2) | 399                                               | (35.7) | 320              | (30.8) |
| 30-day adverse event, <i>n</i> (%)                  | 80                                        | (11.8) | 39                                         | (10.5) | ...                                        | (...)  | ...                                               | (...)  | 133                                               | (11.9) | 214              | (20.6) |
| 30-day readmission, <i>n</i> (%) <sup>†</sup>       | 67                                        | (9.9)  | 28                                         | (7.5)  | 70                                         | (12.1) | 72                                                | (8.3)  | 81                                                | (7.3)  | 184              | (17.7) |
| 30-day mortality, <i>n</i> (%)                      | 23                                        | (3.4)  | 11                                         | (2.9)  | ...                                        | (...)  | 29                                                | (3.3)  | 55                                                | (4.9)  | 48               | (4.6)  |

Abbreviations: IQR =interquartile range (i.e., 25–75<sup>th</sup> percentiles); LOS = length of stay; SD = standard deviation.

<sup>\*</sup> Criteria for clinical instability at discharge varied across primary studies (See Figure 1). As part of the present study, clinical instability at discharge was defined according to

Halm *et al*, 2002.<sup>15</sup>

† Readmission was defined as any readmission within 30 days of discharge for all but one study. Jasti *et al* (2008), defined readmission as any readmission within 30 days of index hospital admission.
